# Supplementary material
Source: PubMed Central journal article supplement (PMC4593396)
Supplement: NIHMS725698-supplement-Supplemental_total.pdf [file NIHMS725698-supplement-Supplemental_total.pdf]

# Supplemental Figure.1

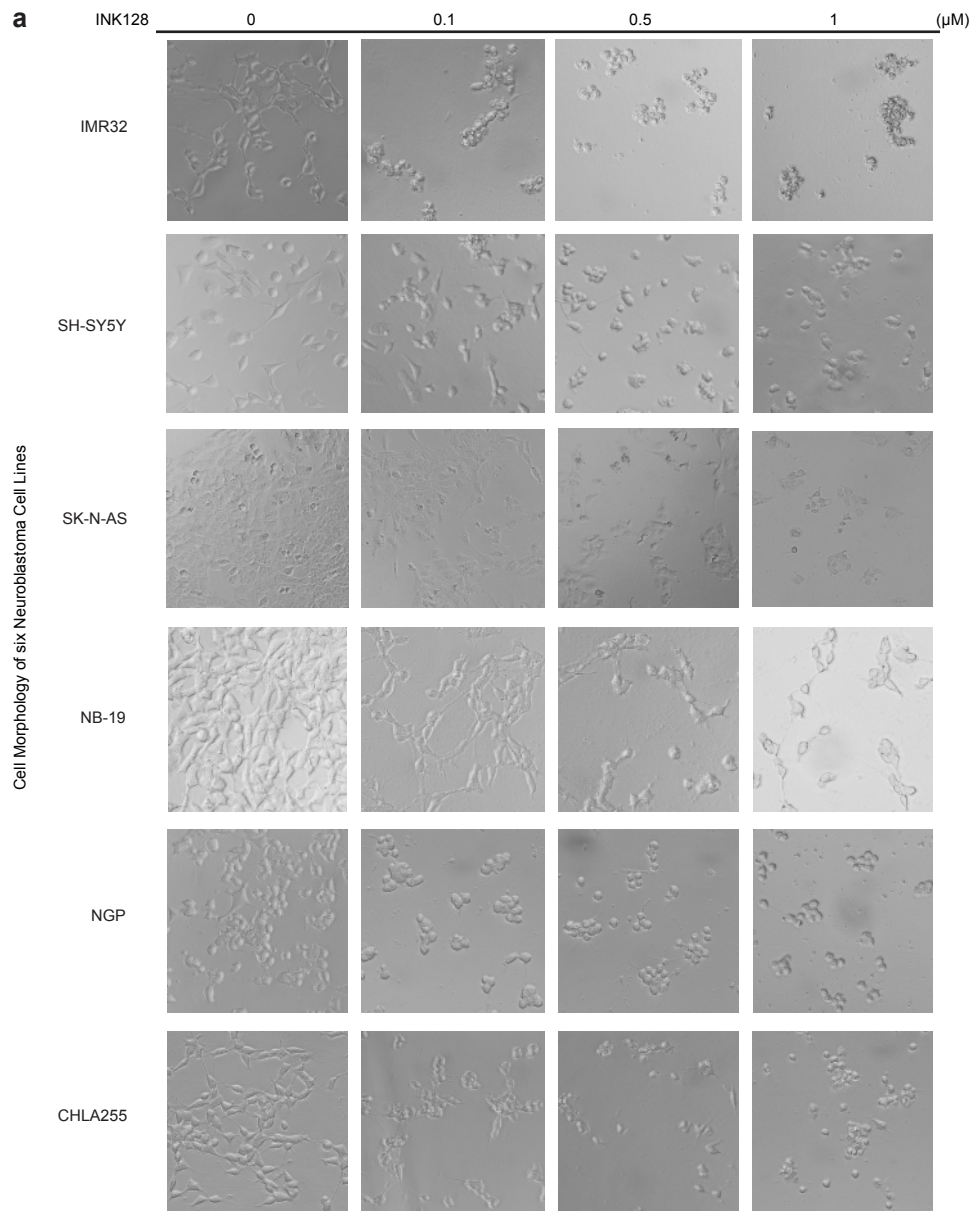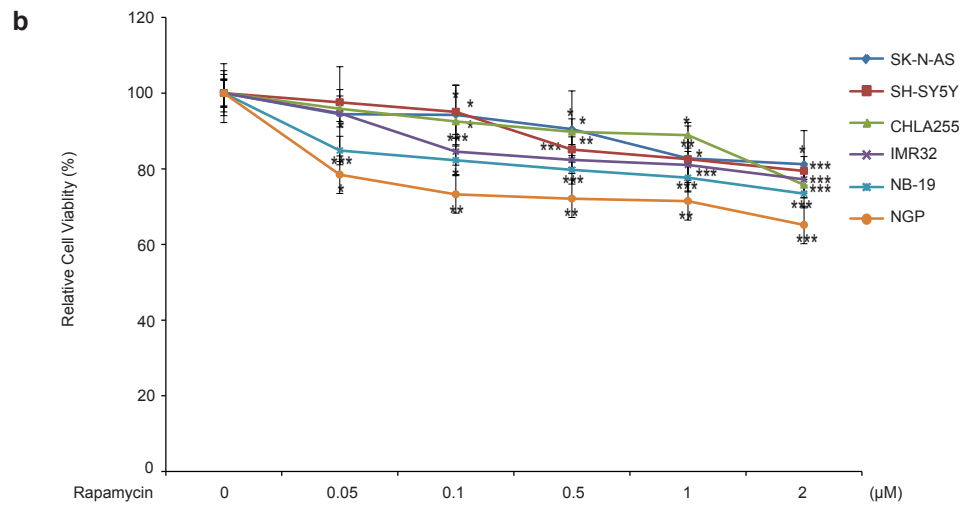

# Supplemental Figure.2

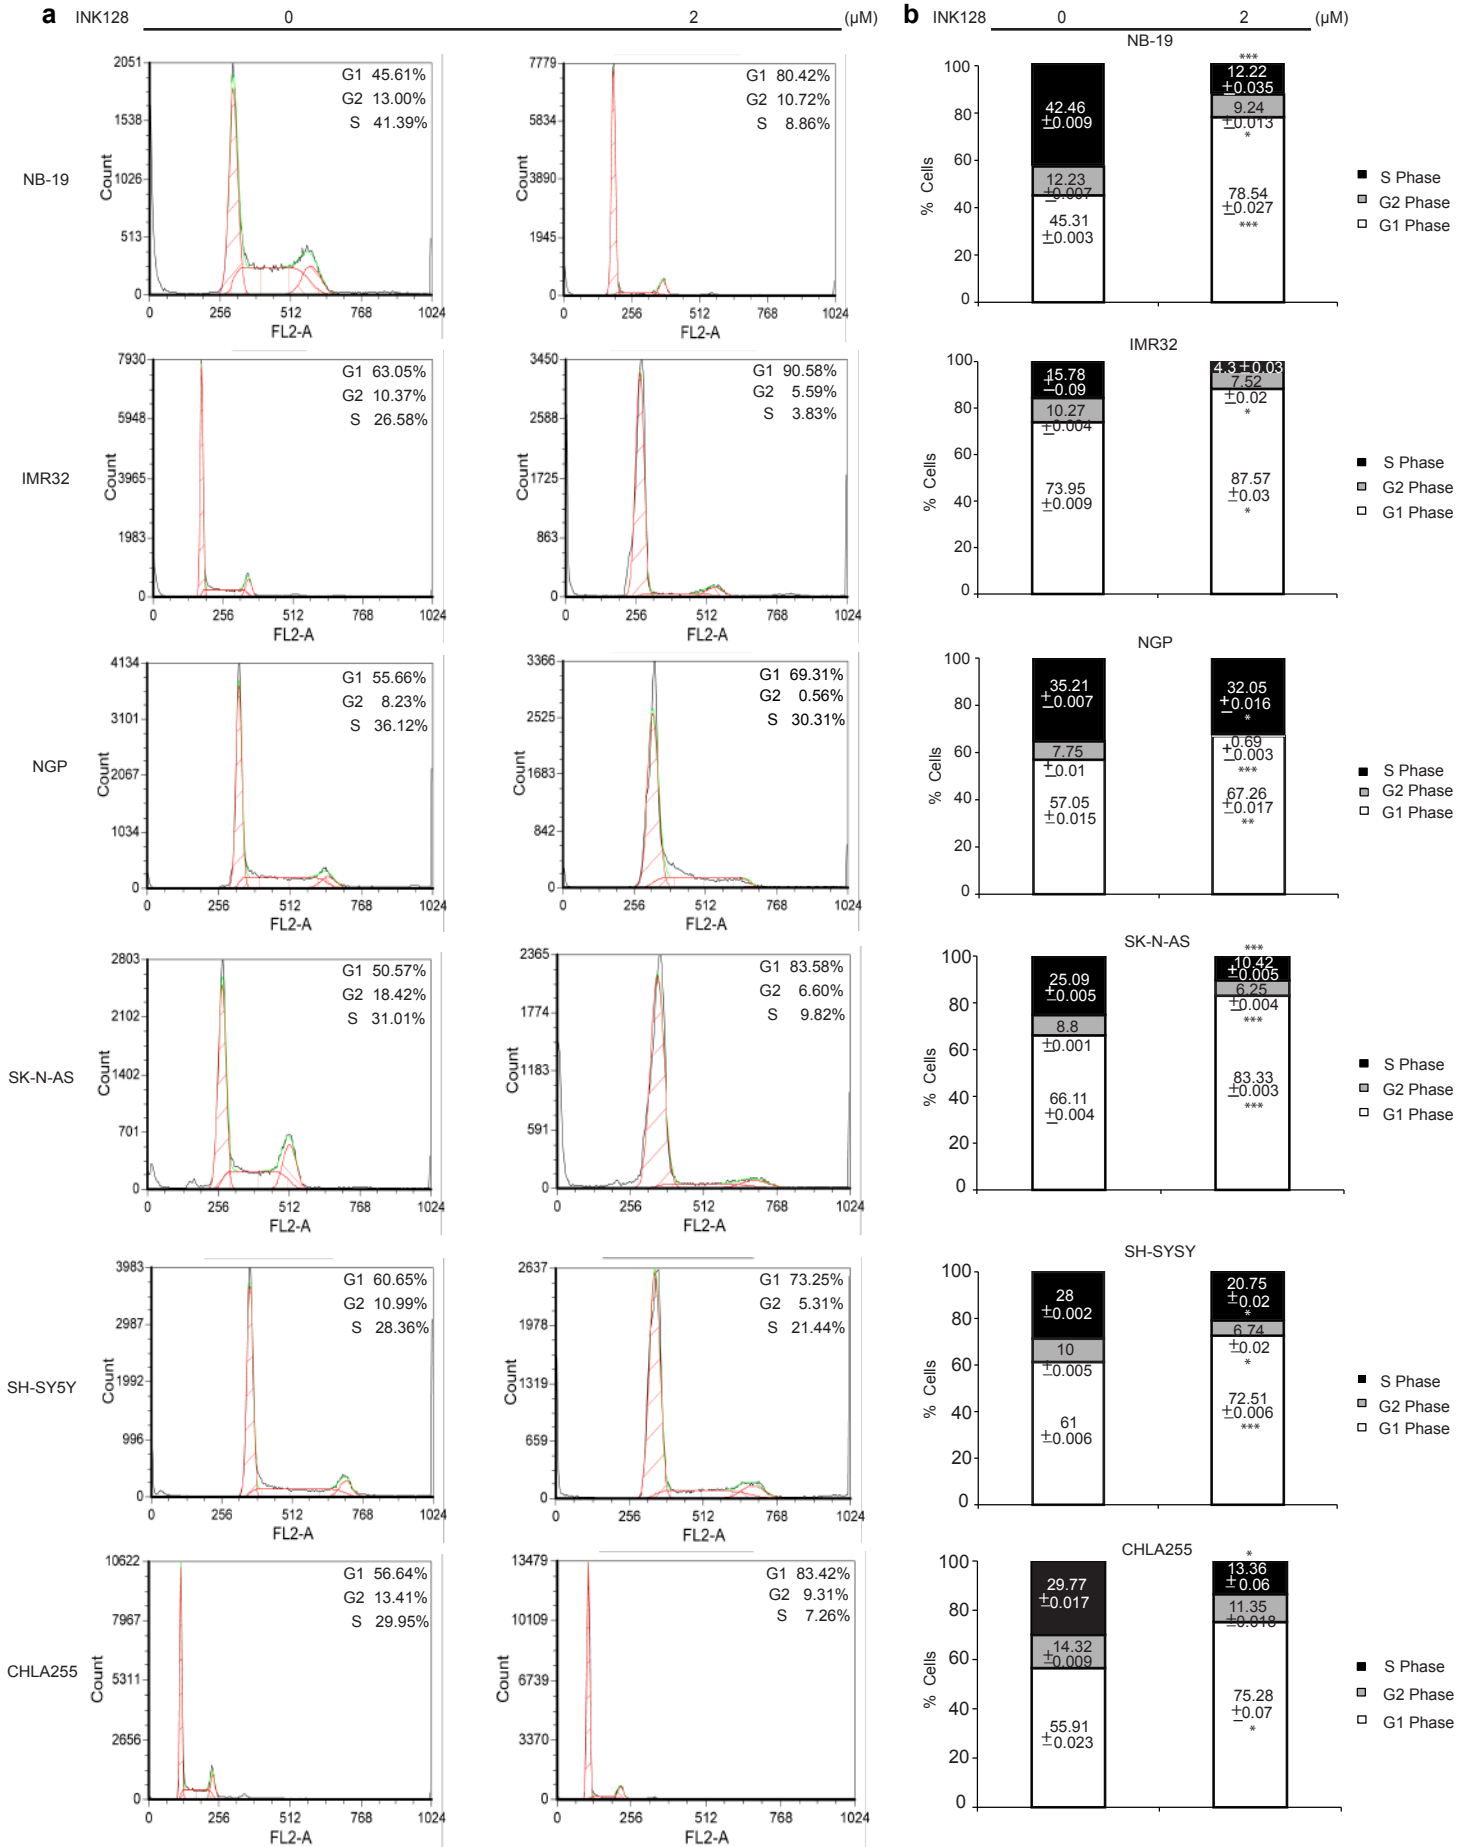

Supplemental Figure.3

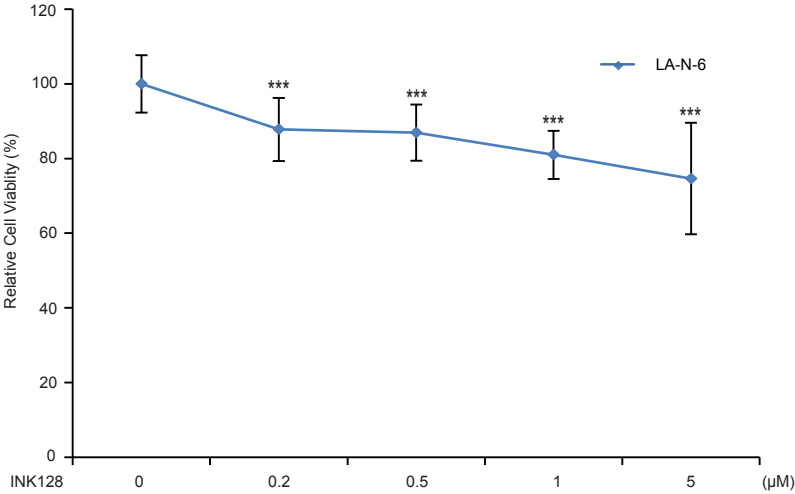

**Supplemental Figure.4**

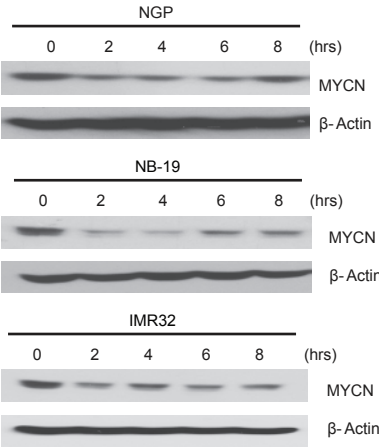

## **Titles and Legends to Supplemental Figures**

**Supplemental Fig.1** INK128 inhibits cell viability of neuroblastoma cells more significantly compared with rapamycin. **(a)** A panel of six neuroblastoma cell lines was treated with indicated concentrations of INK128 for 48 hrs and cell morphology was captured using optical microscope. **(b)** Six neuroblastoma cell lines were treated with the indicated concentrations of rapamycin for 48 hrs. Cell viability was then measured by adding the mixture of 10  $\mu$ L of CCK-8 and 190  $\mu$ L of RPMI 1640 and reading the absorbance at 450 nm. Data were represented as mean  $\pm$  SD. *P* values <0.01 (\*\*) or <0.001 (\*\*\*) were indicated.

**Supplemental Fig.2** INK128 induces G1-phase arrest in neuroblastoma cell lines. **(a)** A panel of six neuroblastoma cells were treated or untreated with 2  $\mu$ M INK128 for 36 hrs, after which cells were fixed and incubated in PI solution. Then cells were analyzed by flow cytometry. **(b)** The results were represented as mean  $\pm$  SD. *P* values <0.05 (\*), <0.01 (\*\*) or <0.001 (\*\*\*) were indicated.

**Supplemental Fig.3** INK128 inhibits LA-N-6 cells proliferation. LA-N-6 cells were treated with the indicated concentrations of INK128 for 72 hrs. Cell viability was then measured by adding the mixture of 10  $\mu$ L of CCK-8 and 190  $\mu$ L of RPMI 1640 and reading the absorbance at 450 nm. Data were represented as mean  $\pm$  SD. *P* values <0.01 (\*\*) or <0.001 (\*\*\*) were indicated.

**Supplemental Fig.4** INK128 induces decreased MYCN protein level in MYCN-amplified neuroblastoma cell lines compared to the untreated control cells. NGP, NB-19 and IMR32 were treated with 5  $\mu$ M INK128 for 0 hr, 2 hrs, 4 hrs, 6 hrs and 8hrs, lysed, subjected to SDS-PAGE and immunoblotted with MYCN antibody.  $\beta$ -Actin was detected as a loading control for whole cell extracts.
